# Supplementary material
Source: Springer Nature journal article supplement (https://www.springermedizin.de/resource/supplementary/12876_2013_1174_MOESM6_ESM.pdf/9438260)

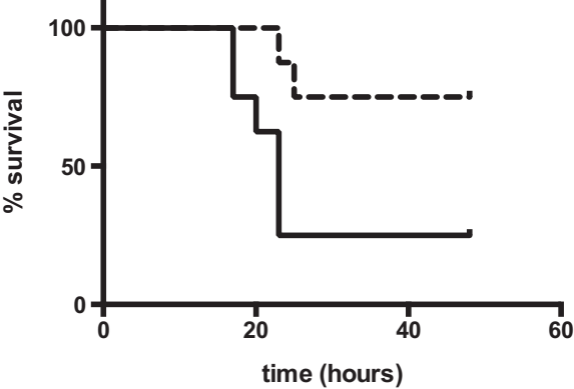

Supplement: MOESM6 [file 9438260]
